# Supplementary material for: The Changing Sensitivity of Wintertime Particulate Nitrate to Precursor Emissions Diagnosed via Satellite Observations of Ammonia and Nitrogen Dioxide over the Midwestern United States
Source: Copernicus journal article supplement (doi:10.5194/egusphere-2025-6554), 2026-01-23
Supplement: Supplementary file 1 [file egusphere-2025-6554-supplement.pdf]

## PN, PS Mass Concentrations and PN/PS Ratio (2007 – 2023)

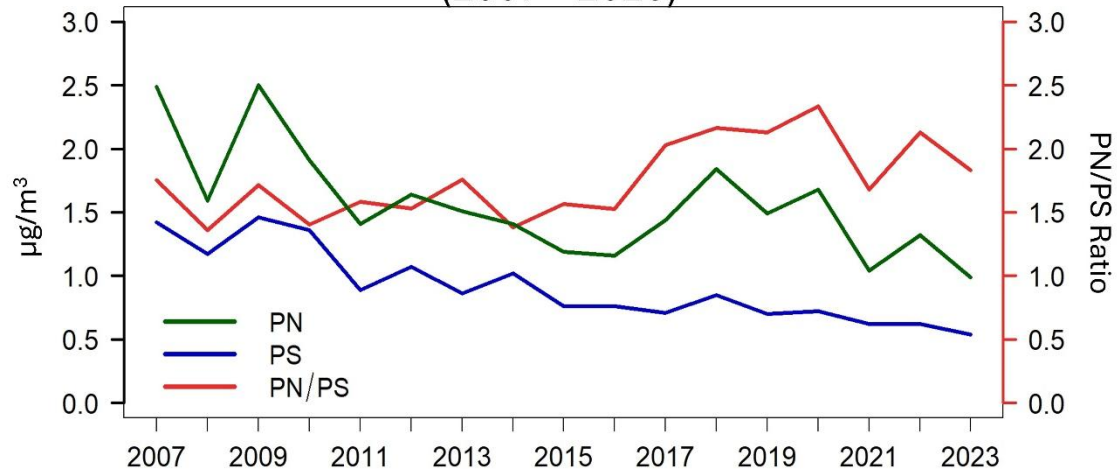

**Figure S1:** Wintertime PN mass concentrations (green), PS mass concentrations (blue), and PN/PS ratios (in red) over the MWUS from 2007 to 2023.

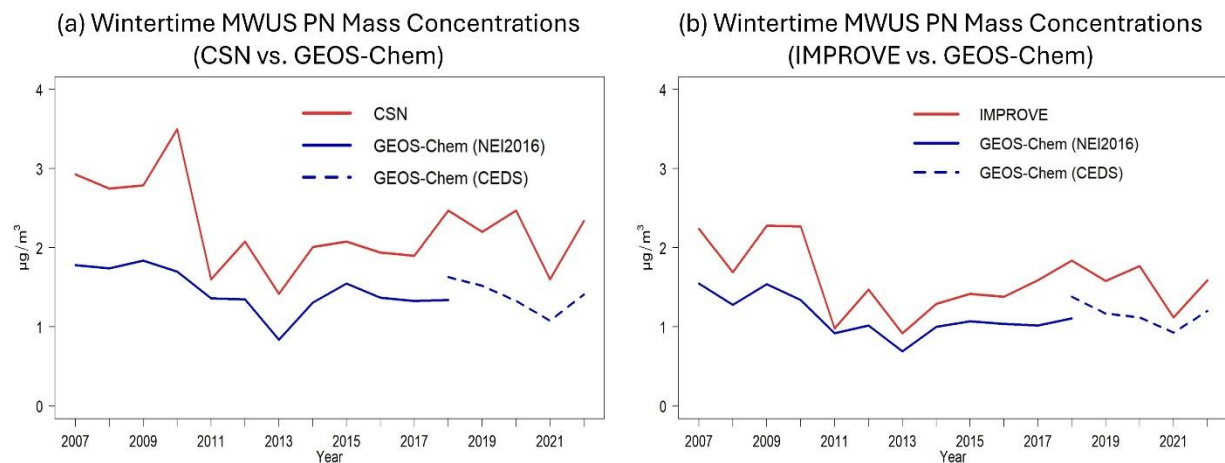

**Figure S2:** The comparisons in wintertime PN trends between ground monitoring observations, (a) CSN and (b) IMPROVE, and the Base simulation in GEOS-Chem. Solid red lines represent the wintertime PN mass concentrations from ground monitoring observations (IMPROVE and CSN). Solid blue lines represent the wintertime PN mass concentrations from GEOS-Chem using NEI2016 emissions inventory. Dashed blue lines represent the wintertime PN mass concentrations from GEOS-Chem using CEDS emissions inventory.

MWUS Wintertime: NO<sub>x</sub> Emissions (2007 – 2022) (NEI2016 vs. CEDS)

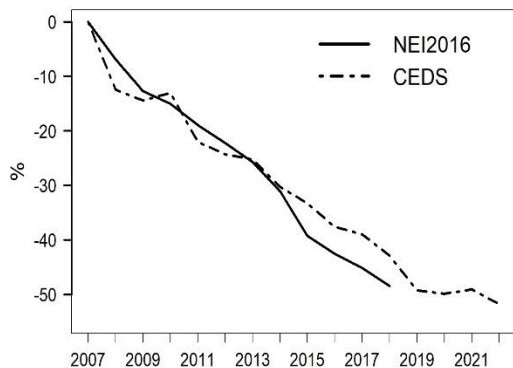

MWUS Wintertime: NH<sub>3</sub> Emissions (2007 – 2022) (NEI2016 vs. CEDS)

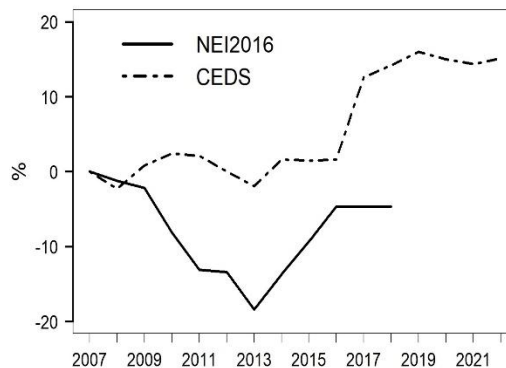

**Figure S3:** Wintertime NO<sub>x</sub> emissions (left) and NH<sub>3</sub> emissions (right) using NEI2016 emissions inventory (solid lines) and CEDS emissions inventory (dashed lines and points) over the MWUS (2007–2022).

(a) Wintertime PN Sensitivity over MWUS using **NEI2016**

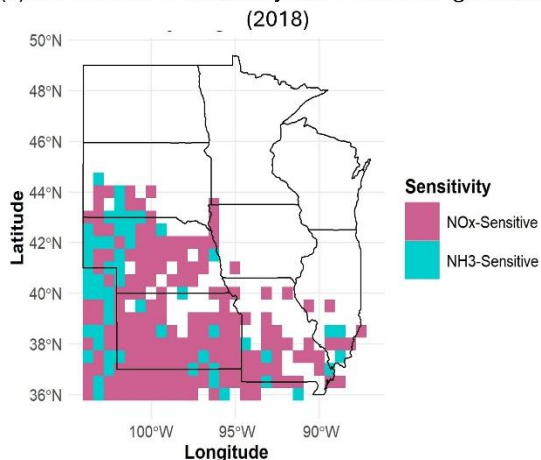

(b) Wintertime PN Sensitivity over MWUS using **CEDS**

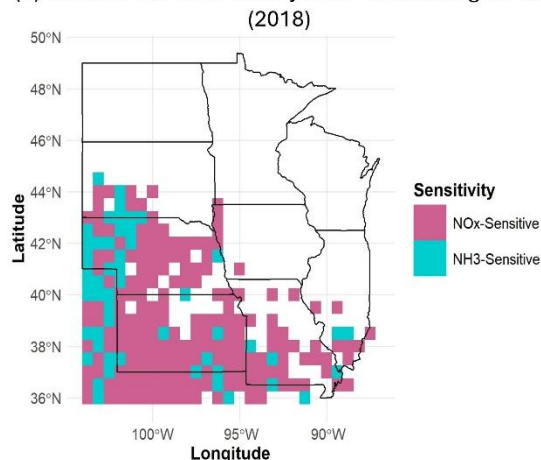

**Figure S4:** Wintertime PN sensitivity in winter 2018 (i.e., Jan 2019) using NEI2016 emissions inventory (left) and CEDS emissions inventory (right). Pink pixels indicate PN formation is sensitive to NO<sub>x</sub> emissions (i.e., NO<sub>x</sub>-sensitive), and blue pixels indicate PN formation is sensitive to NH<sub>3</sub> emissions (i.e., NH<sub>3</sub>-sensitive).

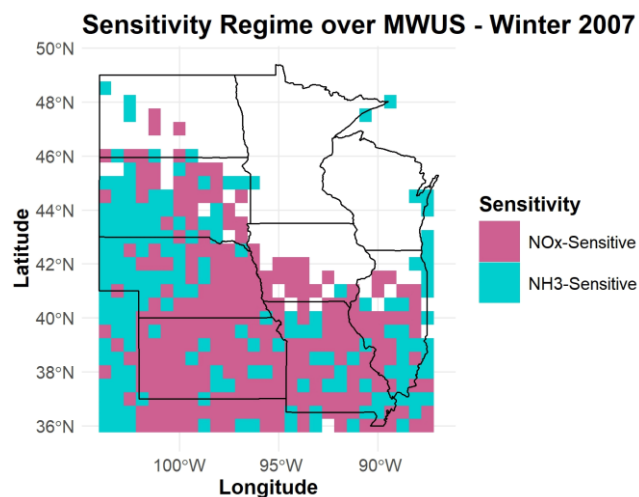

**Figure S5:** The distribution of wintertime PN sensitivity regime over MWUS (2007 – 2023). Pink pixels indicate PN formation is sensitive to  $\text{NO}_x$  emissions (i.e.,  $\text{NO}_x$ -sensitive), and blue pixels indicate PN formation is sensitive to  $\text{NH}_3$  emissions (i.e.,  $\text{NH}_3$ -sensitive).

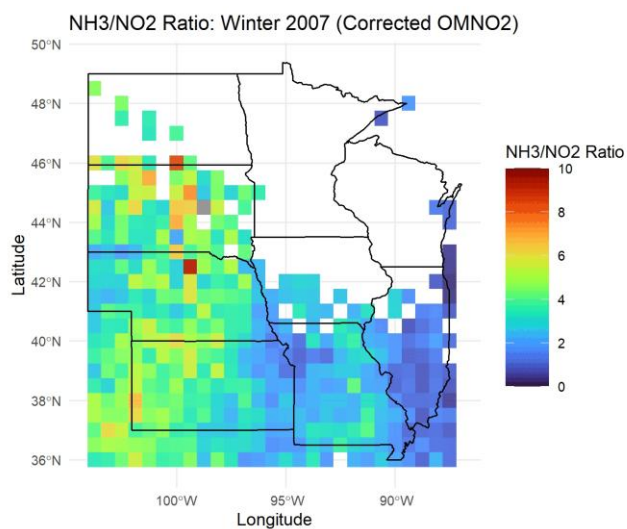

**Figure S6:** The distribution of wintertime satellite tropospheric column  $\text{NH}_3/\text{NO}_2$  ratios over MWUS (2007 – 2023). Grey pixels indicate  $\text{NH}_3/\text{NO}_2$  ratios > 10.

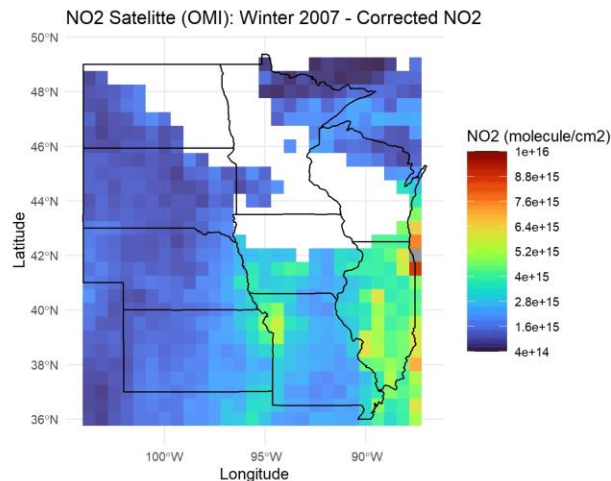

**Figure S7:** The distribution of wintertime NO<sub>2</sub> column density (2007 – 2023) over MWUS. Warmer color indicates higher NO<sub>2</sub> column densities, and colder color indicates lower NO<sub>2</sub> column densities. Grey pixels indicate NO<sub>2</sub> column density  $> 1 \times 10^{16}$  molecules cm<sup>-2</sup>.

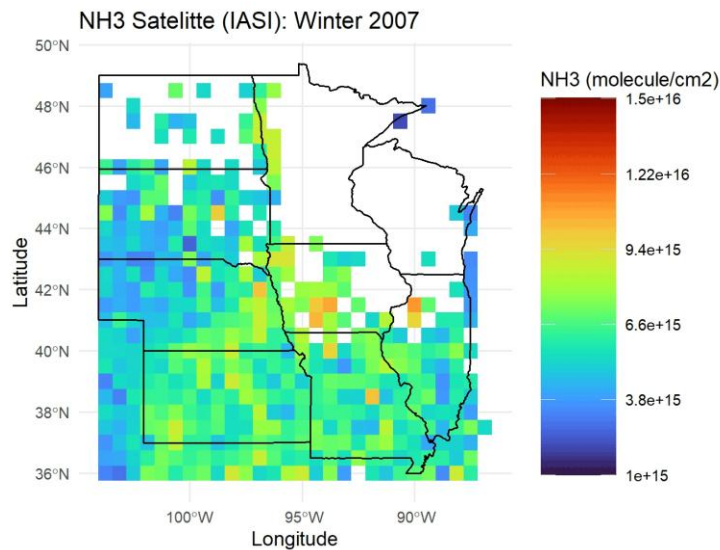

**Figure S8:** The distribution of wintertime NH<sub>3</sub> column density from IASI (2007–2023) over MWUS. Warmer color indicates higher NH<sub>3</sub> column densities, and colder color indicates lower NH<sub>3</sub> column densities. Grey pixels indicate NH<sub>3</sub> column density  $> 1.5 \times 10^{16}$  molecules cm<sup>-2</sup>.

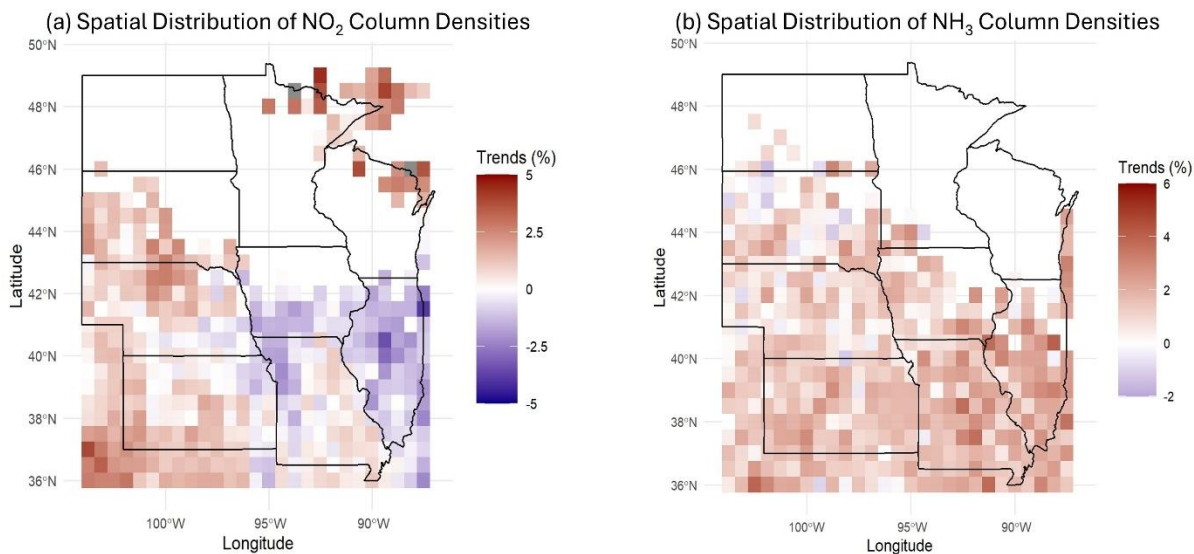

**Figure S9:** The spatial trends of wintertime (a) NO<sub>2</sub> and (b) NH<sub>3</sub> column density over MWUS (2007–2023). The increasing trend of NO<sub>2</sub> and NH<sub>3</sub> column densities is shown in red, and the decreasing trend in NO<sub>2</sub> and NH<sub>3</sub> column densities is shown in blue. Grey pixels indicate an increase > 5% in NO<sub>2</sub> column density for panel (a) only.

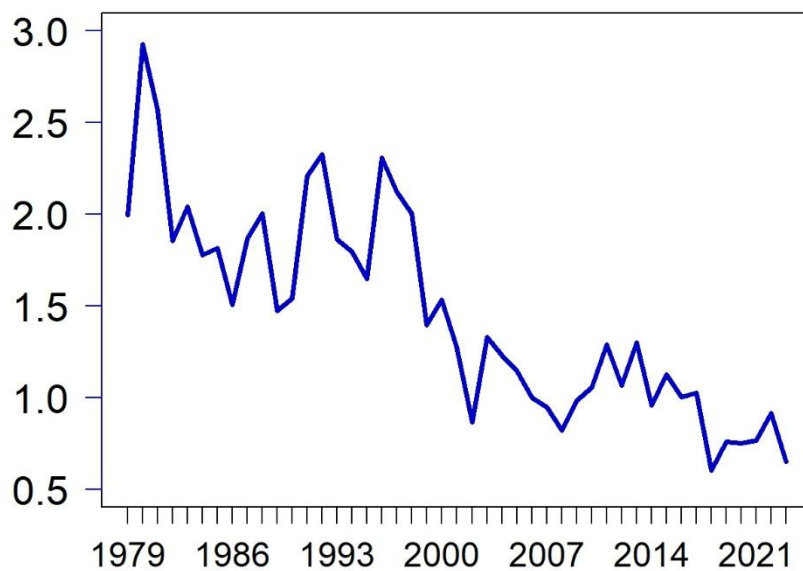

**Figure S10:** Wintertime nitrate wet deposition (NWD) trends over the MWUS from 1979 to 2023 using the National Trends Network.

(a) Percent Contributions of PN, PS, and OC to MWUS PM<sub>2.5</sub> from IMPROVE (2007–2023)

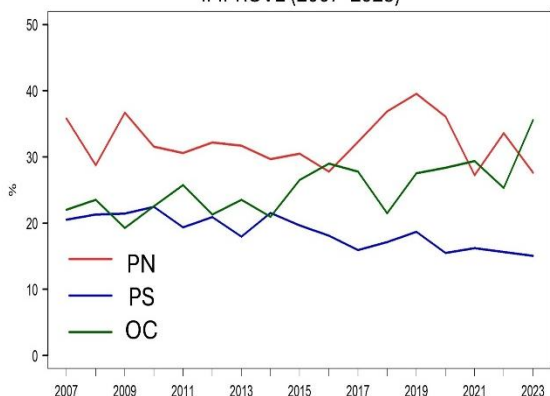

(b) Percent Contributions of PN, PS, and OC to MWUS PM<sub>2.5</sub> from CSN (2007–2023)

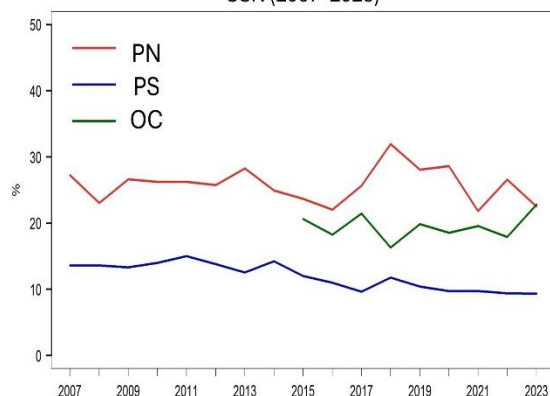

**Figure S11:** The contributions of PN (red), PS (blue), and total organic carbon (OC) (green) to total PM<sub>2.5</sub> trends over the MWUS (2007 – 2023) using (a) IMPROVE and (b) CSN ground monitoring observations.

(a) Wintertime PM<sub>2.5</sub> Mass Concentrations (CSN vs. IMPROVE)

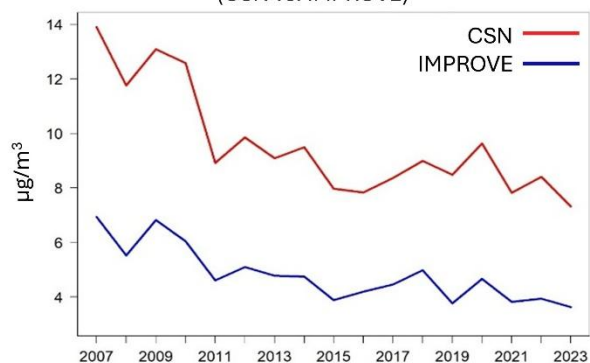

(b) Wintertime PN Mass Concentrations (CSN vs. IMPROVE)

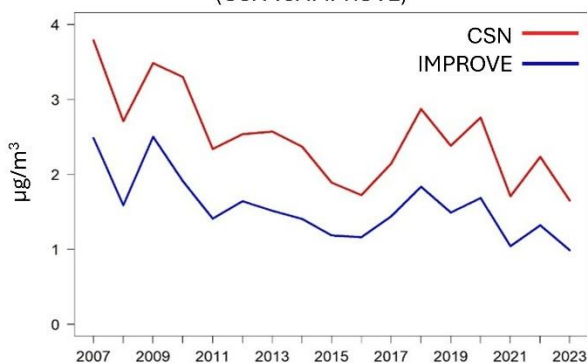

**Figure S12:** Wintertime PM<sub>2.5</sub> and PN trends over urban and rural areas in MWUS (2007 – 2023) using IMPROVE (blue) and CSN (red) ground monitoring observations.
